# Supplementary material for: Single-atom catalysts of TM–porphyrin for alkali oxygen batteries: reaction mechanism and universal design principle
Source: Royal Society of Chemistry journal article supplement (doi:10.1039/d1ta04187h), 2021-01-01
Supplement: d1ta04187h1.pdf [file d1ta04187h1.pdf]

## **Single-Atom Catalysts of TM-Porphyrin for Alkali Oxygen Battery: Reaction Mechanism and Universal Design Principle**

Qian Wu, Shiyong Shen, Rui Peng, Baibiao Huang, Ying Dai\* and Yandong Ma\*

School of Physics, State Key Laboratory of Crystal Materials, Shandong University, Shandan Str. 27, Jinan 250100, China

\*Email: [daiy60@sina.com](mailto:daiy60@sina.com) (Y.D.); [yandong.ma@sdu.edu.cn](mailto:yandong.ma@sdu.edu.cn) (Y.M.)

## 1. Adsorption energy

The consecutive adsorption energy ( $E_{\text{ads}}$ ) of a newly added Li/Na or  $O_2$  of  $Li/Na_xO_{2y}$  ( $x = 0-4$ ,  $y = 0-2$ ) intermediates on Fe/Co/Ni/Cu-porphyrin were calculated as

$$E_{\text{ads}} (\text{Li/Na}) = E_{Li/Na_xO_{2y}} - E_{Li/Na} - E_{Li/Na_{(x-1)}O_{2y}}$$

$$E_{\text{ads}} (O_2) = E_{Li/Na_xO_{2y}} - E_{O_2} - E_{Li/Na_xO_{2(y-1)}}$$

where  $E_{Li/Na_xO_{2y}}$ ,  $E_{Li/Na_{(x-1)}O_{2y}}$  and  $E_{Li/Na_xO_{2(y-1)}}$  are the total energy of  $Li/Na_xO_{2y}$  or  $Li/Na_{(x-1)}O_{2y}$  or  $Li/Na_xO_{2(y-1)}$  adsorbed X-porphyrin ( $X = \text{Fe/Co/Ni/Cu}$ ),  $E_{Li/Na}$  is the energy of Li/Na atom in the bulk phase,  $E_{O_2}$  is the energy of  $O_2$  molecule.

## 2. Equilibrium potential

The equilibrium potential can be obtained by the Nernst equation

$$U_{eq} = -\frac{\Delta G_f}{ne}$$

$$\Delta G_f = G_{Li/Na_xO_{2y}} - xG_{Li/Na} - yG_{O_2}$$

where  $\Delta G_f$  is the standard formation energy of  $Li/Na_xO_{2y}$ ,  $n$  is the number of transferred electrons during the reaction, and  $G_{Li/Na_xO_{2y}}$ ,  $G_{Li/Na}$  and  $G_{O_2}$  are the Gibbs free energies of  $Li/Na_xO_{2y}$ , Li atom of bulk phase and  $O_2$  molecule, respectively.

## 3. Adsorption free energies for intermediates

The adsorption free energies of  $*Li$ ,  $*LiO_2$ ,  $*Li_2O_2$ ,  $*Li_3O_2$ ,  $*Li_4O_2$  are calculated as following:

$$\Delta G_{*Li} = \Delta G (* + Li^+ + e^- \rightarrow *Li)$$

$$= G_{*Li} - G^* - G_{Li}$$

$$= (E_{*Li} - E^* - E_{Li}) + (E_{ZPE(*Li)} - E_{ZPE(*)} - E_{ZPE(Li)}) - T \times (S_{*Li} - S^* - S_{Li})$$

$$\Delta G_{*LiO_2} = \Delta G (* + O_2 + Li \rightarrow *LiO_2)$$

$$= G_{*LiO_2} - G^* - G_{O_2} - G_{Li}$$

$$= (E_{*LiO_2} - E^* - E_{O_2} - E_{Li}) + (E_{ZPE(*LiO_2)} - E_{ZPE(*)} - E_{ZPE(O_2)} - E_{ZPE(*Li)}) - T \times (S_{*LiO_2} - S^* - S_{O_2} - S_{*Li})$$

$$\Delta G_{*Li_2O_2} = \Delta G (* + O_2 + 2Li^+ + e^- \rightarrow *Li_2O_2)$$

$$= G_{*Li_2O_2} - G^* - G_{O_2} - 2G_{Li}$$

$$= (E_{*Li_2O_2} - E^* - E_{O_2} - 2E_{Li}) + (E_{ZPE(*Li_2O_2)} - E_{ZPE(*)} - E_{ZPE(O_2)} - 2E_{ZPE(Li)}) - T \times (S_{*Li_2O_2} - S^* - S_{O_2} - 2S_{Li})$$

$$\Delta G_{*Li_3O_2} = \Delta G (* + O_2 + 3Li^+ + e^- \rightarrow *Li_3O_2)$$

$$= G_{*Li_3O_2} - G_* - G_{O_2} - 3G_{Li}$$

$$= (E_{*Li_3O_2} - E_* - E_{O_2} - 3E_{Li}) + (E_{ZPE(*Li_3O_2)} - E_{ZPE(*)} - E_{ZPE(O_2)} - 3E_{ZPE(Li)}) - T \times (S_{*Li_3O_2} - S_* - S_{O_2} - 3S_{Li})$$

$$\Delta G_{*Li_4O_2} = \Delta G (* + O_2 + 4Li^+ + e^- \rightarrow *Li_4O_2)$$

$$= G_{*Li_4O_2} - G_* - G_{O_2} - 4G_{Li}$$

$$= (E_{*Li_4O_2} - E_* - E_{O_2} - 4E_{Li}) + (E_{ZPE(*Li_4O_2)} - E_{ZPE(*)} - E_{ZPE(O_2)} - 4E_{ZPE(Li)}) - T \times (S_{*Li_4O_2} - S_* - S_{O_2} - 4S_{Li})$$

#### 4. Reaction free energy

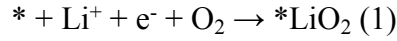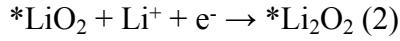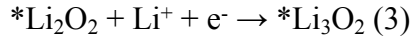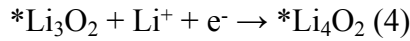

$$\Delta G_1 = G_{*LiO_2} - G_* - G_{Li} - G_{O_2}$$

$$= \Delta G_{*LiO_2}$$

$$\Delta G_2 = G_{*Li_2O_2} - G_{*LiO_2} - G_{Li}$$

$$= \Delta G_{*Li_2O_2} + G_* + G_{O_2} + 2G_{Li} - \Delta G_{*LiO_2} - G_* - G_{O_2} - G_{Li} - G_{Li}$$

$$= \Delta G_{*Li_2O_2} - \Delta G_{*LiO_2}$$

$$\Delta G_3 = G_{*Li_3O_2} - G_{*Li_2O_2} - G_{Li}$$

$$= \Delta G_{*Li_3O_2} + G_* + G_{O_2} + 3G_{Li} - \Delta G_{*Li_2O_2} - G_* - G_{O_2} - 2G_{Li} - G_{Li}$$

$$= \Delta G_{*Li_3O_2} - \Delta G_{*Li_2O_2}$$

$$\Delta G_4 = G_{*Li_4O_2} - G_{*Li_3O_2} - G_{Li}$$

$$= \Delta G_{*Li_4O_2} + G_* + G_{O_2} + 4G_{Li} - \Delta G_{*Li_3O_2} - G_* - G_{O_2} - 3G_{Li} - G_{Li}$$

$$= \Delta G_{*Li_4O_2} - \Delta G_{*Li_3O_2}$$

**Table S1.** Optimized lattice constants of TM-porphyrin (TM = Fe/Co/Ni/Cu) during PBE, PBEsol and SCAN functionals. The unit is Å.

|        | Fe-porphyrin |      | Co-porphyrin |      | Ni-porphyrin |      | Cu-porphyrin |      |
|--------|--------------|------|--------------|------|--------------|------|--------------|------|
|        | a            | b    | a            | b    | a            | b    | a            | b    |
| PBE    | 8.34         | 8.34 | 8.33         | 8.33 | 8.33         | 8.33 | 8.38         | 8.38 |
| PBEsol | 8.33         | 8.33 | 8.31         | 8.31 | 8.31         | 8.31 | 8.36         | 8.36 |
| SCAN   | 8.26         | 8.26 | 8.24         | 8.24 | 8.24         | 8.24 | 8.29         | 8.29 |

**Table S2.** Computed total energies ( $E_{\text{tot}}$ ), thermal correction to Gibbs free energies (zero-point energies ( $E_{\text{ZPE}}$ ) and entropy (TS)), Gibbs free energies (G) and reaction Gibbs free energies ( $\Delta G$ ) of  $^*O_2$  (with side-on/end-on adsorption configurations),  $^*Li$  and  $^*LiO_2$  (with side-on/end-on adsorption configurations of  $O_2$  molecules) intermediates on Fe/Co/Ni/Cu-porphyrin for Li- $O_2$  battery.

|                                   | $E_{\text{tot}}$ (eV) | ZPE-TS (eV) | G (eV)  | $\Delta G$ (eV) |
|-----------------------------------|-----------------------|-------------|---------|-----------------|
| Fe-porphyrin/ $^*O_2$ (side-on)   | -235.58               | 0.06        | -235.52 | -0.59           |
| Fe-porphyrin/ $^*O_2$ (end-on)    | -235.56               | 0.07        | -235.49 | -0.56           |
| Fe-porphyrin/ $^*Li$              | -227.64               | 0.04        | -227.60 | -1.17           |
| Fe-porphyrin/ $^*LiO_2$ (side-on) | -239.35               | 0.11        | -239.24 | -1.24           |
| Fe-porphyrin/ $^*LiO_2$ (end-on)  | -239.37               | 0.12        | -239.25 | -1.25           |
| Co-porphyrin/ $^*O_2$ (side-on)   | -234.03               | 0.06        | -233.97 | 0.08            |
| Co-porphyrin/ $^*O_2$ (end-on)    | -233.52               | 0.04        | -233.48 | 0.57            |
| Co-porphyrin/ $^*Li$              | -226.91               | 0.05        | -226.86 | -1.31           |
| Co-porphyrin/ $^*LiO_2$ (side-on) | -237.93               | 0.09        | -237.84 | -0.58           |
| Co-porphyrin/ $^*LiO_2$ (end-on)  | -237.93               | 0.08        | -237.85 | -0.59           |
| Ni-porphyrin/ $^*O_2$ (side-on)   | -232.15               | -0.04       | -232.19 | 0.37            |
| Ni-porphyrin/ $^*O_2$ (end-on)    | -232.14               | 0.01        | -232.13 | 0.43            |
| Ni-porphyrin/ $^*Li$              | -225.37               | 0.05        | -225.32 | -1.26           |
| Ni-porphyrin/ $^*LiO_2$ (side-on) | -236.01               | 0.04        | -235.97 | -0.25           |

|                                          |         |       |         |       |
|------------------------------------------|---------|-------|---------|-------|
| Ni-porphyrin/*LiO <sub>2</sub> (end-on)  | -236.01 | 0.05  | -235.96 | -0.24 |
| Cu-porphyrin/*O <sub>2</sub> (side-on)   | -229.42 | -0.04 | -229.46 | 0.16  |
| Cu-porphyrin/*O <sub>2</sub> (end-on)    | -229.18 | -0.02 | -229.20 | 0.42  |
| Cu-porphyrin/*Li                         | -222.64 | 0.05  | -222.59 | -1.47 |
| Cu-porphyrin/*LiO <sub>2</sub> (side-on) | -233.30 | 0.08  | -233.22 | -0.23 |
| Cu-porphyrin/*LiO <sub>2</sub> (end-on)  | -233.31 | 0.02  | -233.29 | -0.30 |

**Table S3.** Calculated O-O bond length and atomic charges of adsorbed O<sub>2</sub> molecule at the active site with (w) or without (w/o) Li of Fe/Co/Ni/Cu-porphyrin.

|                                    | Fe-porphyrin | Co-porphyrin | Ni-porphyrin | Cu-porphyrin |
|------------------------------------|--------------|--------------|--------------|--------------|
| O-O bond length (w) (Å)            | 1.35         | 1.33         | 1.30         | 1.30         |
| O-O bond length (w/o) (Å)          | 1.28         | 1.27         | 1.24         | 1.24         |
| charge of O <sub>2</sub> (w) (e)   | 0.67         | 0.59         | 0.44         | 0.46         |
| charge of O <sub>2</sub> (w/o) (e) | 0.32         | 0.25         | 0.07         | 0.03         |

**Table S4.** Computed total energies ( $E_{\text{tot}}$ ), thermal correction to Gibbs free energy (zero-point energies ( $E_{\text{ZPE}}$ ) and entropy (TS)), Gibbs free energy (G) and reaction Gibbs free energies ( $\Delta G$ ) of \*Li<sub>3</sub>O<sub>2</sub>, \*Li<sub>2</sub>O<sub>4</sub>, \*Li<sub>4</sub>O<sub>2</sub> and \*Li<sub>3</sub>O<sub>4</sub> intermediates on Fe/Co/Ni/Cu-porphyrin for Li-O<sub>2</sub> battery.

|                                              | $E_{\text{tot}}$ (eV) | ZPE-TS (eV) | G (eV)  | $\Delta G$ (eV) |
|----------------------------------------------|-----------------------|-------------|---------|-----------------|
| Fe-porphyrin/*Li <sub>3</sub> O <sub>2</sub> | -247.73               | 0.17        | -247.56 | -2.45           |
| Fe-porphyrin/*Li <sub>2</sub> O <sub>4</sub> | -254.15               | 0.08        | -254.07 | -0.46           |
| Fe-porphyrin/*Li <sub>4</sub> O <sub>2</sub> | -251.61               | 0.25        | -241.36 | -1.90           |
| Fe-porphyrin/*Li <sub>3</sub> O <sub>4</sub> | -257.64               | 0.17        | -257.47 | 0.49            |
| Co-porphyrin/*Li <sub>3</sub> O <sub>2</sub> | -245.90               | 0.18        | -245.72 | -1.91           |
| Co-porphyrin/*Li <sub>2</sub> O <sub>4</sub> | -252.77               | 0.10        | -252.67 | -0.36           |
| Co-porphyrin/*Li <sub>4</sub> O <sub>2</sub> | -250.21               | 0.26        | -249.75 | -2.13           |

|                                              |         |      |         |       |
|----------------------------------------------|---------|------|---------|-------|
| Co-porphyrin/*Li <sub>3</sub> O <sub>4</sub> | -255.77 | 0.20 | -255.57 | 0.55  |
| Ni-porphyrin/*Li <sub>3</sub> O <sub>2</sub> | -244.15 | 0.18 | -243.97 | -1.92 |
| Ni-porphyrin/*Li <sub>2</sub> O <sub>4</sub> | -250.54 | 0.13 | -250.41 | 0.09  |
| Ni-porphyrin/*Li <sub>4</sub> O <sub>2</sub> | -247.70 | 0.23 | -247.47 | -1.65 |
| Ni-porphyrin/*Li <sub>3</sub> O <sub>4</sub> | -254.93 | 0.20 | -254.73 | -0.36 |
| Cu-porphyrin/*Li <sub>3</sub> O <sub>2</sub> | -241.49 | 0.20 | -241.29 | -1.97 |
| Cu-porphyrin/*Li <sub>2</sub> O <sub>4</sub> | -247.62 | 0.25 | -247.37 | 0.45  |
| Cu-porphyrin/*Li <sub>4</sub> O <sub>2</sub> | -245.08 | 0.30 | -244.78 | -1.59 |
| Cu-porphyrin/*Li <sub>3</sub> O <sub>4</sub> | -251.40 | 0.17 | -251.23 | 0.46  |

**Table S5.** Optimized TM-N bond lengths with and without absorbents (\*Li/\*LiO<sub>2</sub>/\*Li<sub>2</sub>O<sub>2</sub>/\*Li<sub>3</sub>O<sub>2</sub>/\*Li<sub>4</sub>O<sub>2</sub>) of TM-porphyrin (TM = Fe/Co/Ni/Cu).

|                                              | TM-N1<br>(Å) | TM-N2<br>(Å) | TM-N3<br>(Å) | TM-N4<br>(Å) | magnetic<br>moment of<br>TM (μB) | oxidation<br>state of<br>TM |
|----------------------------------------------|--------------|--------------|--------------|--------------|----------------------------------|-----------------------------|
| Fe-porphyrin                                 | 1.96         | 1.96         | 1.96         | 1.96         | 2.10                             | 1.1                         |
| Fe-porphyrin/*Li                             | 1.94         | 1.94         | 1.97         | 1.97         | 1.81                             | -0.23                       |
| Fe-porphyrin/*LiO <sub>2</sub>               | 1.96         | 1.97         | 2.00         | 2.00         | 0.11                             | 0.32                        |
| Fe-porphyrin/*Li <sub>2</sub> O <sub>2</sub> | 1.98         | 1.96         | 1.98         | 2.00         | 1.00                             | 0.01                        |
| Fe-porphyrin/*Li <sub>3</sub> O <sub>2</sub> | 1.98         | 1.98         | 2.00         | 2.00         | 1.47                             | 0.13                        |
| Fe-porphyrin/*Li <sub>4</sub> O <sub>2</sub> | 1.98         | 1.97         | 2.02         | 2.03         | 2.00                             | -0.02                       |
| Co-porphyrin                                 | 1.95         | 1.95         | 1.95         | 1.95         | 0.62                             | 0.97                        |
| Co-porphyrin/*Li                             | 1.97         | 1.97         | 1.94         | 1.94         | 0.78                             | -0.15                       |
| Co-porphyrin/*LiO <sub>2</sub>               | 1.98         | 1.98         | 1.96         | 1.96         | 1.04                             | 0.24                        |
| Co-porphyrin/*Li <sub>2</sub> O <sub>2</sub> | 1.97         | 1.97         | 1.97         | 1.96         | 0.91                             | 0.02                        |
| Co-porphyrin/*Li <sub>3</sub> O <sub>2</sub> | 1.96         | 1.98         | 1.99         | 1.96         | 0.37                             | -0.03                       |

|                                              |      |      |      |      |      |       |
|----------------------------------------------|------|------|------|------|------|-------|
| Co-porphyrin/*Li <sub>4</sub> O <sub>2</sub> | 1.96 | 2.01 | 2.00 | 1.96 | 1.38 | -0.02 |
| Ni-porphyrin                                 | 1.96 | 1.96 | 1.96 | 1.96 | 0.06 | 0.93  |
| Ni-porphyrin/*Li                             | 1.94 | 1.98 | 1.98 | 1.94 | 0.00 | -0.12 |
| Ni-porphyrin/*LiO <sub>2</sub>               | 1.95 | 1.97 | 1.97 | 1.95 | 0.08 | 0.08  |
| Ni-porphyrin/*Li <sub>2</sub> O <sub>2</sub> | 1.95 | 1.96 | 1.97 | 1.96 | 0.14 | 0.02  |
| Ni-porphyrin/*Li <sub>3</sub> O <sub>2</sub> | 1.97 | 1.96 | 1.96 | 1.96 | 0.00 | -0.1  |
| Ni-porphyrin/*Li <sub>4</sub> O <sub>2</sub> | 1.96 | 1.97 | 1.96 | 1.97 | 0.03 | -0.05 |
| Cu-porphyrin                                 | 2.01 | 2.01 | 2.01 | 2.01 | 0.56 | 0.96  |
| Cu-porphyrin/*Li                             | 1.97 | 2.03 | 2.03 | 1.97 | 0.51 | -0.06 |
| Cu-porphyrin/*LiO <sub>2</sub>               | 1.98 | 2.01 | 2.01 | 1.98 | 0.55 | -0.03 |
| Cu-porphyrin/*Li <sub>2</sub> O <sub>2</sub> | 1.99 | 2.01 | 1.99 | 1.97 | 0.52 | -0.02 |
| Cu-porphyrin/*Li <sub>3</sub> O <sub>2</sub> | 1.99 | 2.00 | 2.01 | 2.00 | 0.51 | -0.03 |
| Cu-porphyrin/*Li <sub>4</sub> O <sub>2</sub> | 2.01 | 2.00 | 2.01 | 2.02 | 0.43 | -0.06 |

**Table S6.** Computed total energies ( $E_{\text{tot}}$ ), thermal correction to Gibbs free energy (zero-point energies ( $E_{\text{ZPE}}$ ) and entropy ( $TS$ )), Gibbs free energy ( $G$ ) and reaction Gibbs free energies ( $\Delta G$ ) of \*Na, \*NaO<sub>2</sub> (with side-on/end-on adsorption configurations of O<sub>2</sub> molecules), \*Na<sub>3</sub>O<sub>2</sub>, \*Na<sub>2</sub>O<sub>4</sub>, \*Na<sub>4</sub>O<sub>2</sub> and \*Na<sub>3</sub>O<sub>4</sub> intermediates on Fe/Co/Ni/Cu-porphyrin for Na-O<sub>2</sub> battery.

|                                              | $E_{\text{tot}}$ (eV) | ZPE-TS (eV) | $G$ (eV) | $\Delta G$ (eV) |
|----------------------------------------------|-----------------------|-------------|----------|-----------------|
| Fe-porphyrin/*Na                             | -227.11               | -0.02       | -227.13  | -1.29           |
| Fe-porphyrin/*NaO <sub>2</sub> (side-on)     | -238.76               | 0.05        | -238.71  | -1.18           |
| Fe-porphyrin/*NaO <sub>2</sub> (end-on)      | -238.76               | 0.04        | -238.72  | -1.19           |
| Fe-porphyrin/*Na <sub>3</sub> O <sub>2</sub> | -244.51               | 0.01        | -244.50  | -1.34           |
| Fe-porphyrin/*Na <sub>2</sub> O <sub>4</sub> | -253.06               | 0.04        | -253.02  | -0.77           |
| Fe-porphyrin/*Na <sub>4</sub> O <sub>2</sub> | -248.19               | -0.01       | -248.20  | -2.39           |
| Fe-porphyrin/*Na <sub>3</sub> O <sub>4</sub> | -256.01               | 0.02        | -255.99  | -1.09           |

|                                              |         |       |         |       |
|----------------------------------------------|---------|-------|---------|-------|
| Co-porphyrin/*Na                             | -226.21 | -0.02 | -226.23 | -1.27 |
| Co-porphyrin/*NaO <sub>2</sub> (side-on)     | -237.04 | -0.01 | -237.05 | -0.42 |
| Co-porphyrin/*NaO <sub>2</sub> (end-on)      | -237.08 | 0.05  | -237.03 | -0.40 |
| Co-porphyrin/*Na <sub>3</sub> O <sub>2</sub> | -242.72 | 0.01  | -242.71 | -1.21 |
| Co-porphyrin/*Na <sub>2</sub> O <sub>4</sub> | -251.37 | 0.02  | -251.35 | -0.76 |
| Co-porphyrin/*Na <sub>4</sub> O <sub>2</sub> | -244.78 | -0.04 | -244.82 | -0.80 |
| Co-porphyrin/*Na <sub>3</sub> O <sub>4</sub> | -254.25 | -0.02 | -254.27 | -1.16 |
| Ni-porphyrin/*Na                             | -224.66 | -0.02 | -224.68 | -1.21 |
| Ni-porphyrin/*NaO <sub>2</sub> (side-on)     | -235.24 | 0.02  | -235.22 | -0.14 |
| Ni-porphyrin/*NaO <sub>2</sub> (end-on)      | -235.24 | -0.05 | -235.29 | -0.21 |
| Ni-porphyrin/*Na <sub>3</sub> O <sub>2</sub> | -241.15 | -0.04 | -241.19 | -1.34 |
| Ni-porphyrin/*Na <sub>2</sub> O <sub>4</sub> | -249.44 | -0.05 | -249.49 | -0.55 |
| Ni-porphyrin/*Na <sub>4</sub> O <sub>2</sub> | -243.49 | -0.06 | -243.55 | -1.05 |
| Ni-porphyrin/*Na <sub>3</sub> O <sub>4</sub> | -251.55 | -0.04 | -251.59 | 0.00  |
| Cu-porphyrin/*Na                             | -221.90 | -0.02 | -221.92 | -1.39 |
| Cu-porphyrin/*NaO <sub>2</sub> (side-on)     | -232.51 | -0.03 | -232.54 | -0.22 |
| Cu-porphyrin/*NaO <sub>2</sub> (end-on)      | -232.51 | -0.02 | -232.53 | -0.21 |
| Cu-porphyrin/*Na <sub>3</sub> O <sub>2</sub> | -238.43 | -0.04 | -238.47 | -1.43 |
| Cu-porphyrin/*Na <sub>2</sub> O <sub>4</sub> | -246.72 | -0.02 | -246.74 | -0.61 |
| Cu-porphyrin/*Na <sub>4</sub> O <sub>2</sub> | -240.86 | 0.01  | -240.85 | -1.07 |
| Cu-porphyrin/*Na <sub>3</sub> O <sub>4</sub> | -250.18 | -0.02 | -250.20 | -1.33 |



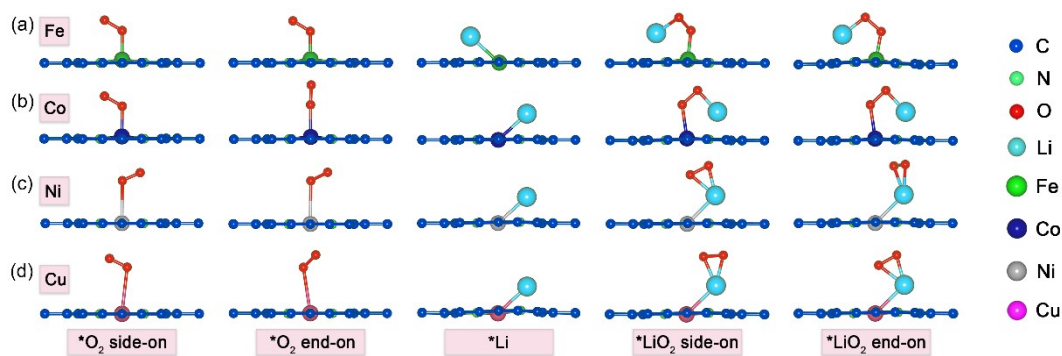

**Figure S1.** Optimized structures of the possible configurations of  $*O_2$  (side/end-on),  $*Li$ ,  $*LiO_2$  (side/end-on) adsorbed on (a) Fe-porphyrin, (b) Co-porphyrin, (c) Ni-porphyrin and (d) Cu-porphyrin.

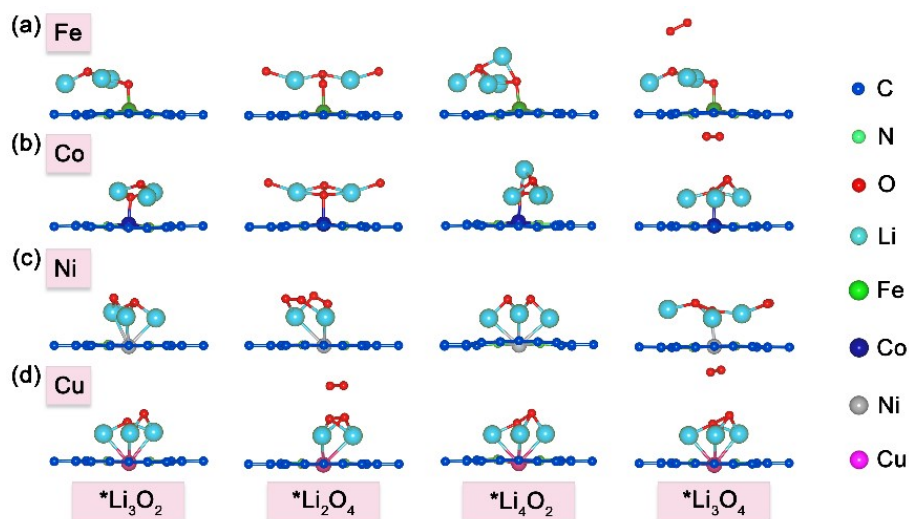

**Figure S2.** Optimized structures of the possible configurations of intermediates ( $*Li_3O_2$ ,  $*Li_2O_4$ ,  $*Li_4O_2$  and  $*Li_3O_4$ ) adsorbed on (a) Fe-porphyrin, (b) Co-porphyrin, (c) Ni-porphyrin and (d) Cu-porphyrin.

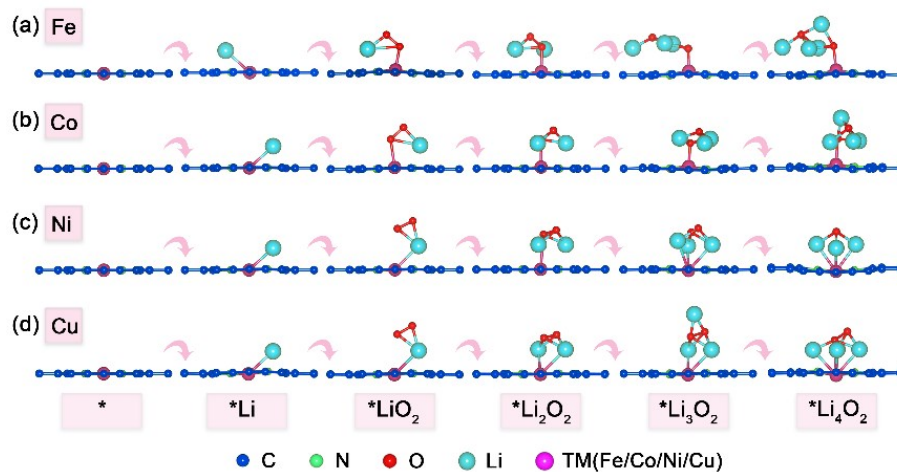

**Figure S3.** Optimized structures of all the favorable intermediates for Li-O<sub>2</sub> battery on (a) Fe-porphyrin, (b) Co-porphyrin, (c) Ni-porphyrin and (d) Cu-porphyrin.

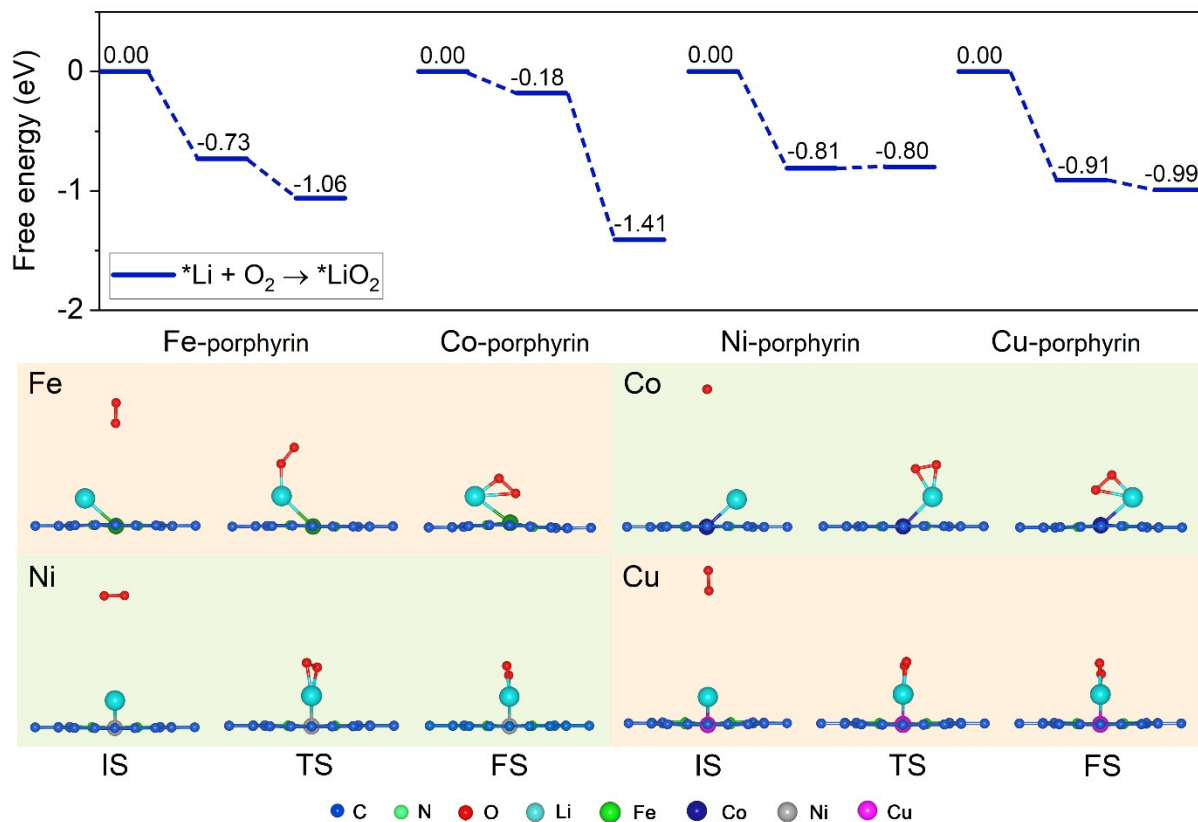

**Figure S4.** Calculated kinetic barriers and optimized structures for the reaction step of  $*Li + O_2 \rightarrow *LiO_2$  on Fe/C/Ni/Cu-porphyrin.

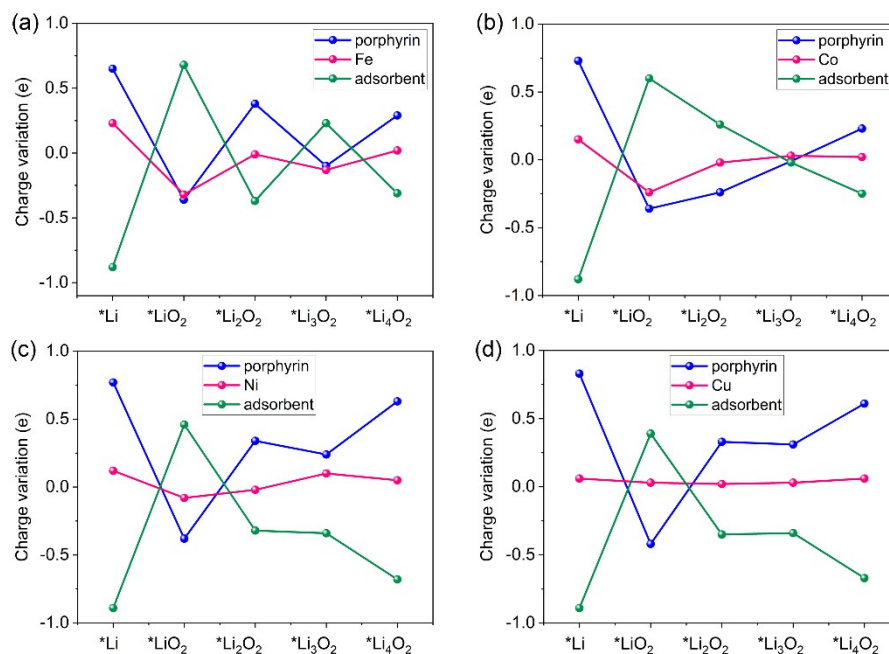

**Figure S5.** Bader charge variation of each reduction step during the most favorable pathway for Li-O<sub>2</sub> battery.

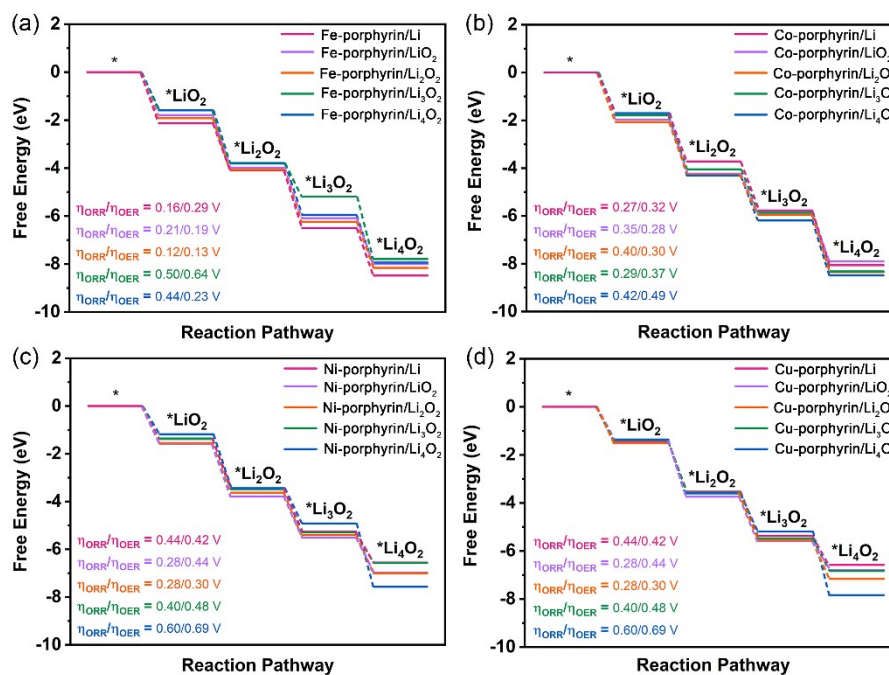

**Figure S6.** Calculated energetic profiles of the reaction pathway of (a) Fe-porphyrin, (b) Co-porphyrin, (c) Ni-porphyrin and (d) Cu-porphyrin with the regulation of possible axial ligand ( $-Li/LiO_2/Li_2O_2/Li_3O_2/Li_4O_2$ ) for Li-O<sub>2</sub> battery.

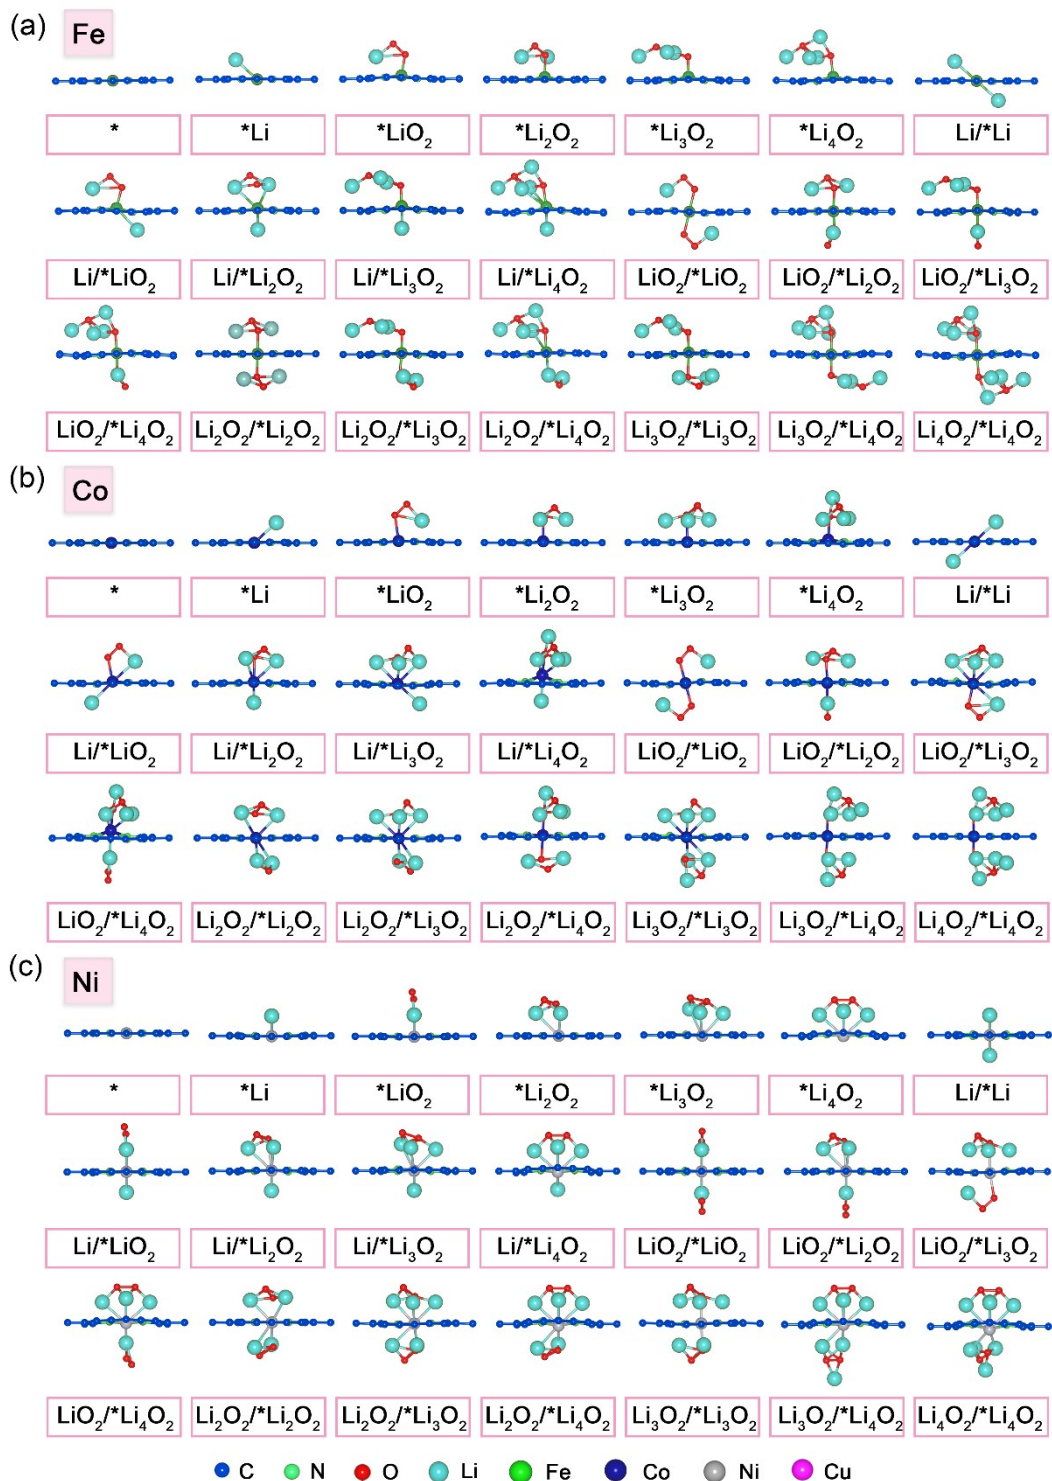

**Figure S7.** Optimized structures of the various intermediates on (a) Fe-porphyrin, (b) Co-porphyrin, (c) Ni-porphyrin and (d) Cu-porphyrin with the regulation of possible axial ligand (-Li/LiO<sub>2</sub>/Li<sub>2</sub>O<sub>2</sub>/Li<sub>3</sub>O<sub>2</sub>/Li<sub>4</sub>O<sub>2</sub>) for Li-O<sub>2</sub> battery.

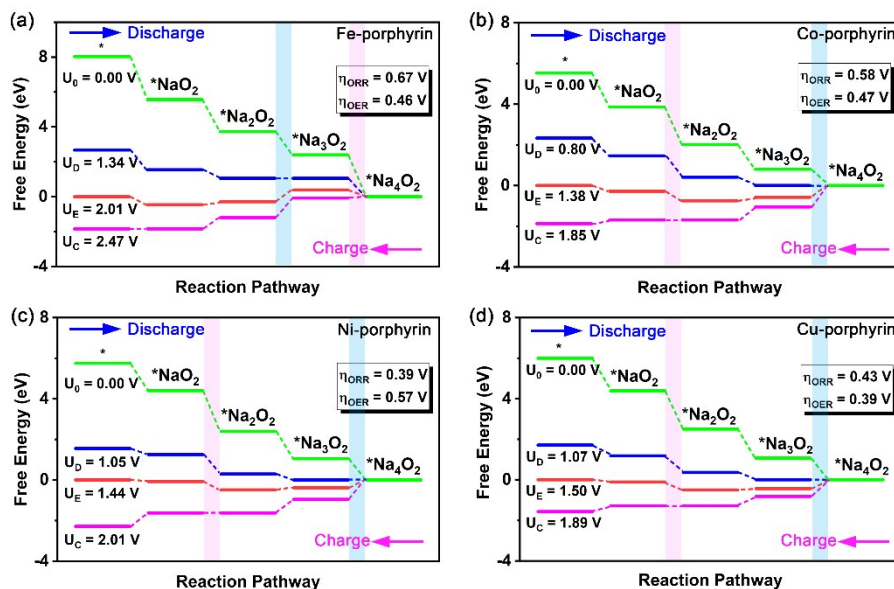

**Figure S8.** Calculated energetic profiles of the most favorable reaction pathway of (a) Fe-porphyrin, (b) Co-porphyrin, (c) Ni-porphyrin and (d) Cu-porphyrin for Na-O<sub>2</sub> battery under different potentials. The rate determining steps for ORR and OER are marked with blue and pink shadows, respectively.

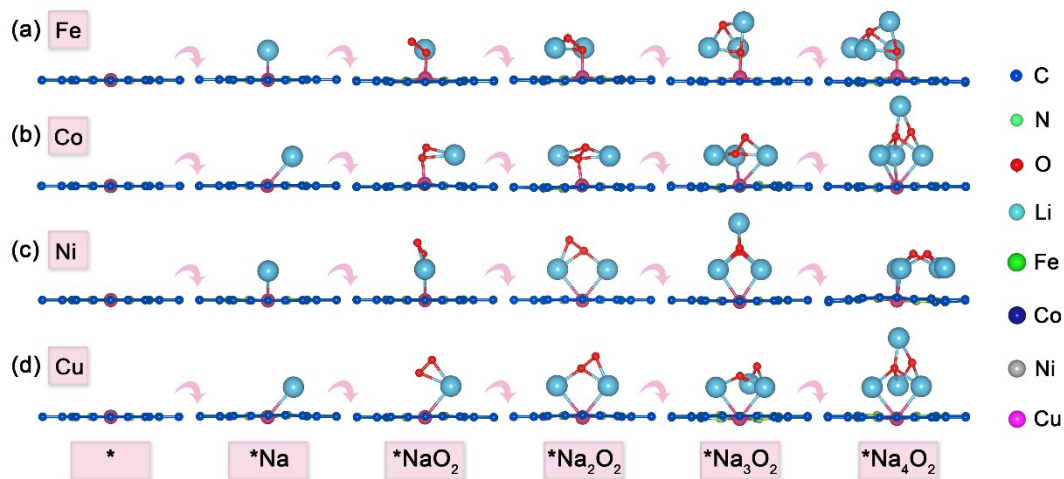

**Figure S9.** Optimized structures of all the favorable intermediates for Na-O<sub>2</sub> battery on (a) Fe-porphyrin, (b) Co-porphyrin, (c) Ni-porphyrin and (d) Cu-porphyrin.

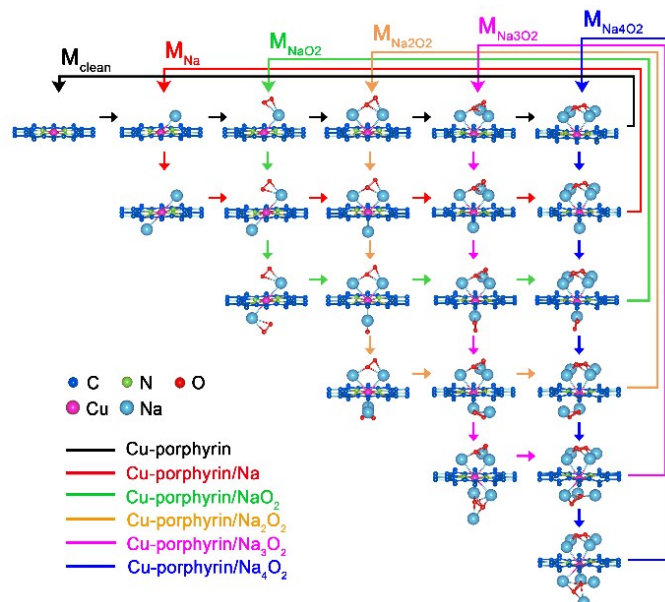

**Figure S10.** Schematic diagram of charge and discharge mechanisms for Na-O<sub>2</sub> battery of Cu-porphyrin under the axial ligand effect.

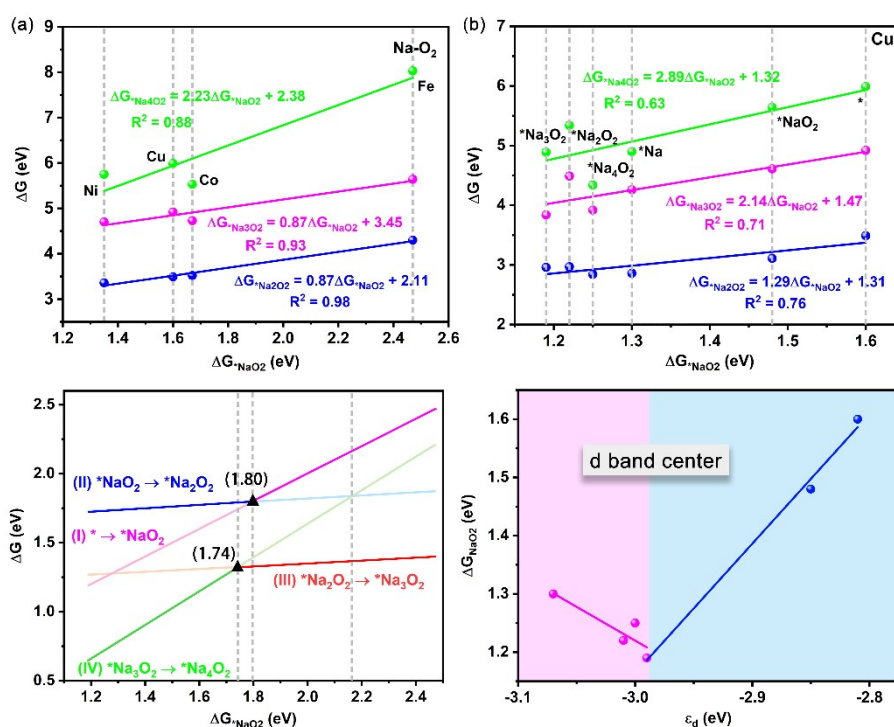

**Figure S11.** Scaling relationships between the adsorption free energies of  $\text{*Na}_2\text{O}_2$  ( $\Delta G_{\text{Na}_2\text{O}_2}^*$ ) (blue line)/ $\text{*Na}_3\text{O}_2$  ( $\Delta G_{\text{Na}_3\text{O}_2}^*$ ) (mauve line)/ $\text{*Na}_4\text{O}_2$  ( $\Delta G_{\text{Na}_4\text{O}_2}^*$ ) (green line) and  $\text{*NaO}_2$  ( $\Delta G_{\text{NaO}_2}^*$ ) for (a) TM-porphyrin without axial ligands and (b) Cu-porphyrin with axial ligands. (c) Linear fitting relationships between the Gibbs free energies for each reaction steps and  $\Delta G_{\text{NaO}_2}^*$  for TM-porphyrin without axial ligands and Cu-porphyrin with axial ligands, the RDS is highlight in bold lines. (d)  $\Delta G_{\text{Na}_2\text{O}_2}^*$  v.s.  $d$  band center for TM-porphyrin without axial ligands and Cu-porphyrin with axial ligands.

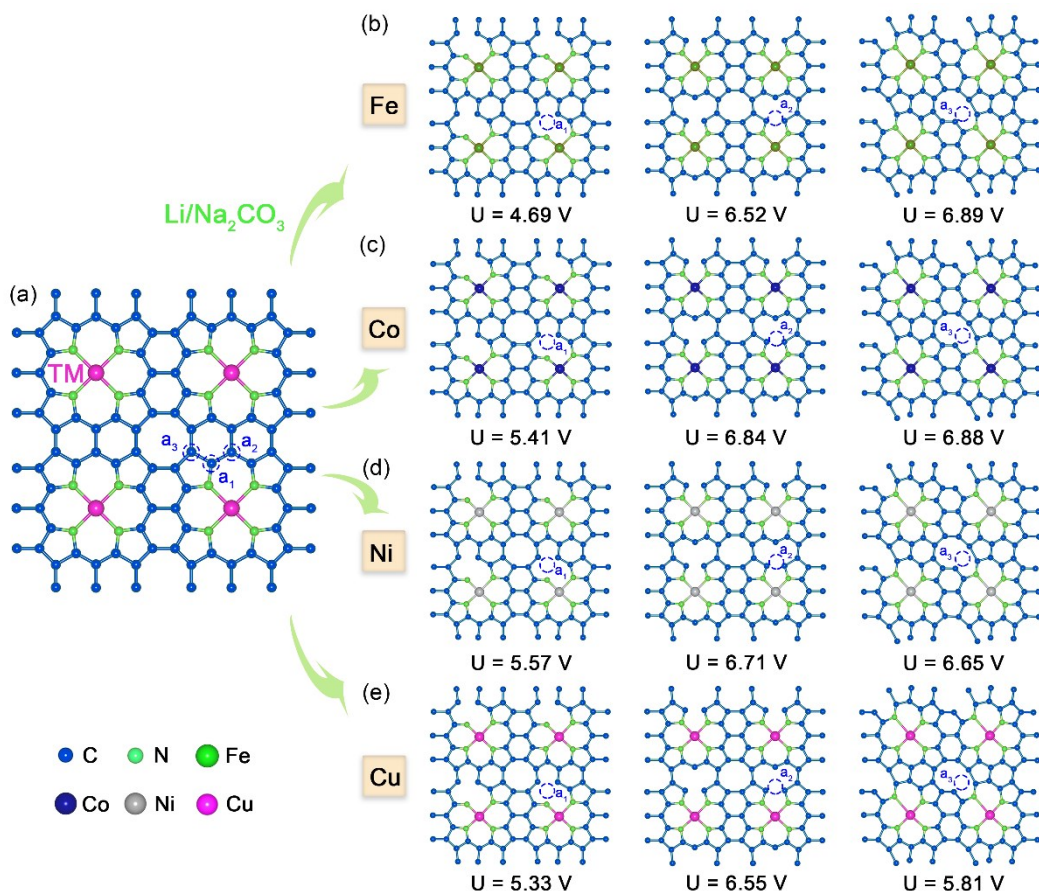

**Figure S12.** Possible decompose mechanism of C atom on (a) Fe-porphyrin, (b) Co-porphyrin, (c) Ni-porphyrin and (d) Cu-porphyrin during Li/Na- $\text{O}_2$  battery. All the possible decomposition sites and the decompose energies of C atom are presented.

### Geometrical coordinates for Fe/Co/Ni/Cu-porphyrin

#### (1) Fe-porphyrin

Fe

```

1.0000000000000000
 8.3393881215521724   0.0000486951705568   -0.0010601483020709
 0.0000487032686134   8.3426253931376220   0.0027173978865331
-0.0025398124304948   0.0065118589676466   19.9995389544333193

```

```

C   N   Fe
20  4   1

```

Direct

```

0.8385397494807114   0.6435639793966684   0.5355314221480639
0.9205731548765586   0.4973023236830370   0.5355532939441661
0.0935960628444251   0.4972795718262578   0.5356030508406995
0.1756607314589791   0.6435509588875703   0.5355684431533704
0.0911196248076074   0.7922055996845621   0.5356000023359424
0.9231151259647671   0.7922019647180711   0.5355543393021787
0.1756942853493212   0.3510754652976009   0.5355585819420057
0.0911008645458540   0.2024203588388155   0.5355821935992869

```

|                    |                    |                    |
|--------------------|--------------------|--------------------|
| 0.9230859617759289 | 0.2024349317517738 | 0.5355522928433886 |
| 0.8385025299008527 | 0.3510878547518351 | 0.5355012421588142 |
| 0.2122037128066573 | 0.9132811502243497 | 0.5355663707592802 |
| 0.2122163633137314 | 0.0813965596563095 | 0.5355657528715890 |
| 0.6534144074072853 | 0.8288973492224507 | 0.5353897810560290 |
| 0.5071325992402785 | 0.9108932130300327 | 0.5353946403431528 |
| 0.3608321909325127 | 0.8288923933735882 | 0.5354709285960325 |
| 0.3608155925487218 | 0.1657954763886970 | 0.5354720029490295 |
| 0.6533804849680911 | 0.1658017922117680 | 0.5353967763653524 |
| 0.5071050026062478 | 0.0838453499381526 | 0.5353920997784575 |
| 0.8020553856166825 | 0.9132895873808811 | 0.5354049200589054 |
| 0.8019974505580999 | 0.0814036433504143 | 0.5354236679325621 |
| 0.3410323124340265 | 0.6633696089214539 | 0.5353698195279798 |
| 0.6731576728884242 | 0.3312938931083115 | 0.5355097387811922 |
| 0.3410383286012932 | 0.3312923693740141 | 0.5353740503260526 |
| 0.6731845849381835 | 0.6633812642856362 | 0.5355143519538376 |
| 0.5071018201347572 | 0.4973395188002361 | 0.5354102364326205 |

(2) Co-porphyrin

Co

1.0000000000000000

|                     |                    |                     |
|---------------------|--------------------|---------------------|
| 8.3276921900413114  | 0.0000489941825582 | -0.0000941693172639 |
| 0.0000489631194576  | 8.3278674461090780 | 0.0015445827515630  |
| -0.0002264172095754 | 0.0037148252037095 | 20.0631170759865540 |

C N Co

20 4 1

Direct

|                    |                    |                    |
|--------------------|--------------------|--------------------|
| 0.8381061757933923 | 0.6432376075887892 | 0.5355717044512590 |
| 0.9205628548278422 | 0.4973062722640707 | 0.5355579519950097 |
| 0.0936102208709977 | 0.4972883146729682 | 0.5355769597597922 |
| 0.1761066072305340 | 0.6432204939071833 | 0.5355968734209766 |
| 0.0910763706086664 | 0.7920002537090820 | 0.5356100779911586 |
| 0.9231734458061447 | 0.7920155964183065 | 0.5355945163739616 |
| 0.1761575033860963 | 0.3514191857441738 | 0.5354768012872647 |
| 0.0910660400185709 | 0.2026381990480867 | 0.5355146786617548 |
| 0.9231385644233117 | 0.2026488000431344 | 0.5355270251359379 |
| 0.8380559245104708 | 0.3514272998428539 | 0.5354638513548354 |
| 0.2124098564917961 | 0.9133658644008041 | 0.5355256081950234 |
| 0.2124311390784807 | 0.0813145472025345 | 0.5354730360095709 |
| 0.6530135470597945 | 0.8283282184090771 | 0.5354951694422623 |
| 0.5071136570942490 | 0.9108534057365772 | 0.5354413032811445 |
| 0.3612153137725592 | 0.8283176409290758 | 0.5355048876774262 |
| 0.3612071258363417 | 0.1663547220326262 | 0.5354014778033165 |
| 0.6529940956529683 | 0.1663499835209847 | 0.5353848715104256 |
| 0.5070926994397073 | 0.0838692210177011 | 0.5353658439081775 |
| 0.8018351577434107 | 0.9133643234071970 | 0.5355111551944636 |
| 0.8017917451636695 | 0.0813144436968233 | 0.5354779949483682 |
| 0.3415125298723442 | 0.6629137373808400 | 0.5355183757993639 |
| 0.6726630057457909 | 0.3317385167852470 | 0.5353628256052561 |



|                    |                    |                    |
|--------------------|--------------------|--------------------|
| 0.3415271942714849 | 0.3317439764839304 | 0.5353910647764136 |
| 0.6726969907588214 | 0.6629314981170814 | 0.5355033006874933 |
| 0.5070982345425535 | 0.4973340557433044 | 0.5354126447293057 |

(3) Ni-porphyrin

Ni

|                     |                    |                     |
|---------------------|--------------------|---------------------|
| 1.000000000000000   |                    |                     |
| 8.3296107454396431  | 0.0000197176849619 | -0.0000585273027794 |
| 0.0000196820682479  | 8.3294162501871867 | 0.0013273997226290  |
| -0.0001405024564793 | 0.0031905497768735 | 20.0547660102743599 |

|    |   |    |
|----|---|----|
| C  | N | Ni |
| 20 | 4 | 1  |

Direct

|                    |                    |                    |
|--------------------|--------------------|--------------------|
| 0.8380258740056095 | 0.6431948400081359 | 0.5355095916540797 |
| 0.9205997504215412 | 0.4973050811872239 | 0.5355909092609693 |
| 0.0935729628993571 | 0.4972888668893273 | 0.5356170391263391 |
| 0.1761859436779578 | 0.6431864667411906 | 0.5355362208564513 |
| 0.0912627937615296 | 0.7923964423908958 | 0.5355516132305007 |
| 0.9229782560001061 | 0.7923870702131870 | 0.5355420980945230 |
| 0.1762418252187176 | 0.3514534960973817 | 0.5355913075217804 |
| 0.0912492273922400 | 0.2022418580863715 | 0.5355952416922475 |
| 0.9229547855830026 | 0.2022570872164611 | 0.5356072559896804 |
| 0.8379597736029829 | 0.3514576419223240 | 0.5355732393482353 |
| 0.2120146932334335 | 0.9131821485324775 | 0.5354445349688265 |
| 0.2120471924201200 | 0.0814987079050356 | 0.5354963725239269 |
| 0.6529740035182511 | 0.8282497079751981 | 0.5353665542842156 |
| 0.5071216390600312 | 0.9108920832546907 | 0.5353383012586287 |
| 0.3612652375542786 | 0.8282324180920368 | 0.5353724344834671 |
| 0.3612588686173854 | 0.1664347064502361 | 0.5354882018892470 |
| 0.6529449086957402 | 0.1664442095003835 | 0.5354721838087146 |
| 0.5071006190465882 | 0.0838356656545672 | 0.5354090451630751 |
| 0.8022257776591737 | 0.9131835295740462 | 0.5354515374619064 |
| 0.8021647022231368 | 0.0815034722362043 | 0.5355186855134166 |
| 0.3409306323795090 | 0.6635009941258386 | 0.5353940156431498 |
| 0.6732451390153478 | 0.3311602694798314 | 0.5354796901866655 |
| 0.3409455818127217 | 0.3311515311614293 | 0.5355202442435981 |
| 0.6732859091118414 | 0.6635199063813049 | 0.5353786346045237 |
| 0.5070999030893816 | 0.4973379770266809 | 0.5354150471918231 |

(4) Cu-porphyrin

Cu

|                     |                    |                     |
|---------------------|--------------------|---------------------|
| 1.000000000000000   |                    |                     |
| 8.3816465665531226  | 0.0000892177061530 | -0.0011605339425849 |
| 0.0000815787466574  | 8.3825274800040006 | 0.0185431496603946  |
| -0.0022046308077294 | 0.0488699581444734 | 18.2452837848878886 |

|    |   |    |
|----|---|----|
| C  | N | Cu |
| 20 | 4 | 1  |

Direct

|                    |                    |                    |
|--------------------|--------------------|--------------------|
| 0.8395803124943699 | 0.6445350727520905 | 0.5354882060087433 |
| 0.9207344549504869 | 0.4973582359911677 | 0.5354766033746579 |

|                    |                    |                    |
|--------------------|--------------------|--------------------|
| 0.0934824233731108 | 0.4973399438569953 | 0.5355572600781666 |
| 0.1746673958905885 | 0.6445161040311774 | 0.5355798081369528 |
| 0.0904966006036218 | 0.7934409595851383 | 0.5354715086932872 |
| 0.9237167988368695 | 0.7934895453442459 | 0.5354644767520639 |
| 0.1746545780670793 | 0.3501476555215501 | 0.5355691158576800 |
| 0.0904812907090826 | 0.2011393941475397 | 0.5355016761943503 |
| 0.9236967595011125 | 0.2011984465848733 | 0.5353886472209619 |
| 0.8395577520762741 | 0.3501977345231709 | 0.5354192840172327 |
| 0.2109019019401109 | 0.9138733609952172 | 0.5355208351688765 |
| 0.2108993571612590 | 0.0807061103395671 | 0.5355267063577200 |
| 0.6543170024827930 | 0.8298609804383630 | 0.5354504689940556 |
| 0.5071099507382848 | 0.9109852281261865 | 0.5354362386477205 |
| 0.3599167183950289 | 0.8298066671593202 | 0.5355688490807906 |
| 0.3598916057742955 | 0.1648072273326350 | 0.5355153499852190 |
| 0.6542920548459349 | 0.1648264478857699 | 0.5353600778769699 |
| 0.5070945490696779 | 0.0836922326759059 | 0.5354149818391950 |
| 0.8033134022369744 | 0.9139298509445084 | 0.5354414818801387 |
| 0.8033067789204588 | 0.0807598350625574 | 0.5353477320687312 |
| 0.3372991162275666 | 0.6671636083466336 | 0.5356769714091975 |
| 0.6769298646638209 | 0.3274897231579251 | 0.5354344376856320 |
| 0.3372649850724301 | 0.3274698317714237 | 0.5355568876034323 |
| 0.6769415608928830 | 0.6672095638664233 | 0.5354804583428965 |
| 0.5071087850758558 | 0.4973524176620882 | 0.5356119367253328 |

(5) Co-porphyrin/\*Li

Li

1.0000000000000000

|                    |                    |                     |
|--------------------|--------------------|---------------------|
| 8.3418200000000002 | 0.0000000000000000 | 0.0000000000000000  |
| 0.0000000000000000 | 8.3399999999999999 | 0.0000000000000000  |
| 0.0000000000000000 | 0.0000000000000000 | 20.0000000000000000 |

| Li | C  | N | Co |
|----|----|---|----|
| 1  | 20 | 4 | 1  |

Direct

|                    |                    |                    |
|--------------------|--------------------|--------------------|
| 0.5073792803983252 | 0.7040629901864293 | 0.6195145455099507 |
| 0.8390570541400209 | 0.6352615327720628 | 0.5387607692884586 |
| 0.9207299139290157 | 0.4889602146166538 | 0.5388389696093654 |
| 0.0935878388671725 | 0.4889539513331442 | 0.5388825768782866 |
| 0.1753171939099971 | 0.6352457103813833 | 0.5388728934670084 |
| 0.0918211103855029 | 0.7840648538457913 | 0.5380299369243673 |
| 0.9225444488163319 | 0.7840849908476315 | 0.5379624736222368 |
| 0.1762677740918548 | 0.3430793286723031 | 0.5377347945441073 |
| 0.0916600024365408 | 0.1942754581570583 | 0.5373160348293524 |
| 0.9226599822101562 | 0.1942958245463657 | 0.5373009861359535 |
| 0.8380499478961383 | 0.3430976942282982 | 0.5377012593243933 |
| 0.2113736389766459 | 0.9049132373165207 | 0.5366571508358220 |
| 0.2117928666950348 | 0.0740574218796723 | 0.5365259902426374 |
| 0.6542713151254205 | 0.8213842313671975 | 0.5356746054663404 |
| 0.5071832601945161 | 0.9033410083828315 | 0.5356298630305645 |
| 0.3601007310644064 | 0.8213773384590581 | 0.5357702753132045 |

|                    |                    |                    |
|--------------------|--------------------|--------------------|
| 0.3608709814321998 | 0.1581338849195149 | 0.5362868454037795 |
| 0.6534569947937570 | 0.1581400174298722 | 0.5362470865561733 |
| 0.5071607072156255 | 0.0764919985229966 | 0.5360129080953868 |
| 0.8029926765963822 | 0.9049427568315025 | 0.5365819233799698 |
| 0.8025578434444114 | 0.0740981843180606 | 0.5364879916595413 |
| 0.3413258913121666 | 0.6542795058055262 | 0.5378562171150634 |
| 0.6728568011384723 | 0.3232122275027436 | 0.5368942726235559 |
| 0.3414697096764243 | 0.3232090270498631 | 0.5369327320176467 |
| 0.6730570498978992 | 0.6542923262994762 | 0.5377350629219819 |
| 0.5071894235759444 | 0.4860774251933080 | 0.5364691319416934 |

(6) Co-porphyrin/\*LiO<sub>2</sub>

LiO<sub>2</sub>

1.0000000000000000

|                    |                    |                     |
|--------------------|--------------------|---------------------|
| 8.3418200000000002 | 0.0000000000000000 | 0.0000000000000000  |
| 0.0000000000000000 | 8.3399999999999999 | 0.0000000000000000  |
| 0.0000000000000000 | 0.0000000000000000 | 20.0000000000000000 |

|    |    |   |   |    |
|----|----|---|---|----|
| Li | C  | N | O | Co |
| 1  | 20 | 4 | 2 | 1  |

Direct

|                    |                    |                    |
|--------------------|--------------------|--------------------|
| 0.5072331690201182 | 0.7150687219405470 | 0.6225314498860449 |
| 0.8390410682380784 | 0.6335163313619375 | 0.5362831832398697 |
| 0.9209338689830200 | 0.4871479723668574 | 0.5363574399747918 |
| 0.0937982953494992 | 0.4871351815064920 | 0.5363541096752021 |
| 0.1757062817630871 | 0.6334930487082989 | 0.5362445448755288 |
| 0.0916261718808389 | 0.7821583419470782 | 0.5344111437855501 |
| 0.9231197180253312 | 0.7821594004785001 | 0.5344510087054305 |
| 0.1761979975193124 | 0.3409533743346963 | 0.5343154974939688 |
| 0.0913579410977058 | 0.1920372485350490 | 0.5332673441483484 |
| 0.9233837944807137 | 0.1920501675939513 | 0.5332947983302627 |
| 0.8385431957170009 | 0.3409633821993181 | 0.5343379525899865 |
| 0.2113887752329727 | 0.9032098024092713 | 0.5323541539533067 |
| 0.2117788007221110 | 0.0714536043585062 | 0.5318681158575398 |
| 0.6543405236080279 | 0.8193041507592140 | 0.5324052957564711 |
| 0.5073775948272629 | 0.9013695190811014 | 0.5317888252781545 |
| 0.3604206953293331 | 0.8192896179270880 | 0.5322858310225268 |
| 0.3608411997180650 | 0.1558649342078511 | 0.5317025782995352 |
| 0.6538949480153778 | 0.1558766397323035 | 0.5317973614930389 |
| 0.5073826847433789 | 0.0743995939054096 | 0.5315742039604200 |
| 0.8033782740219253 | 0.9032304952566897 | 0.5324972103923807 |
| 0.8029511534548727 | 0.0714689354506283 | 0.5319956494933562 |
| 0.3409791664621897 | 0.6536189779906549 | 0.5355928023381231 |
| 0.6743557637840915 | 0.3201301473174620 | 0.5329545151900547 |
| 0.3403730768649922 | 0.3201184559018587 | 0.5328888548323399 |
| 0.6737628617800298 | 0.6536229250554699 | 0.5356651256742595 |
| 0.5069672704249799 | 0.4484588550749367 | 0.6449292280003646 |
| 0.5057659608994718 | 0.5652941391760848 | 0.6898450269189147 |
| 0.5073673859303165 | 0.4844525287449897 | 0.5385755321117145 |

(7) Co-porphyrin/\*Li<sub>2</sub>O<sub>2</sub>

Li2O2

1.0000000000000000  
 8.3418199999999985 0.0000000000000000 0.0000000000000000  
 0.0000000000000000 8.3399999999999999 0.0000000000000000  
 0.0000000000000000 0.0000000000000000 30.0000000000000000

Li C N O Co  
 2 20 4 2 1

Direct

0.4659016030162778 0.7059190790422216 0.4223065157992276  
 0.7222228042214496 0.4501576361027722 0.4222417166193276  
 0.8283976826056282 0.6273800947431741 0.3584186642644710  
 0.9110249940222666 0.4807614518886002 0.3587497980363660  
 0.0839986874161406 0.4809805167656881 0.3591659671825195  
 0.1652559239869109 0.6275908492421114 0.3587839808951888  
 0.0812417919305965 0.7764736146589026 0.3582841634576850  
 0.9123831069120013 0.7763141751271128 0.3584073668598753  
 0.1661958974483046 0.3347505154417924 0.3589353483722011  
 0.0819358470957915 0.1855421539752904 0.3584057887916944  
 0.9132936975972407 0.1846619532601697 0.3580328262823541  
 0.8295594007301625 0.3336539018331421 0.3578050743927957  
 0.2009072623853753 0.8970929108949171 0.3580409895385541  
 0.2017765792137974 0.0657463312022002 0.3584205866370694  
 0.6435735335578440 0.8121662583425734 0.3584418701757384  
 0.4969764821525317 0.8948067249658139 0.3587779892600961  
 0.3498763090350647 0.8133415712935198 0.3578219107508333  
 0.3509452765069154 0.1500180224722021 0.3589413369636256  
 0.6437819544474881 0.1490627977195011 0.3587678953266936  
 0.4971620309115126 0.0678436136561180 0.3591698565102993  
 0.7924629329371596 0.8961760687628920 0.3584214905503377  
 0.7926148569392207 0.0650285618926554 0.3582849986038925  
 0.3301482399063093 0.6476903353348320 0.3585062587521498  
 0.6639258266155559 0.3139750308753764 0.3584891047254912  
 0.3305268756591814 0.3143713314375597 0.3591417880107446  
 0.6634619116352466 0.6472145816903402 0.3581525666351609  
 0.4978872514988618 0.4817781250564927 0.4315977493341794  
 0.6076647537054553 0.5915133955009028 0.4545459435390872  
 0.4963889130908272 0.4801994252479957 0.3621671478280512

(8) Co-porphyrin/\*Li<sub>3</sub>O<sub>2</sub>

Li3O2

1.0000000000000000  
 8.3418199999999985 0.0000000000000000 0.0000000000000000  
 0.0000000000000000 8.3399999999999999 0.0000000000000000  
 0.0000000000000000 0.0000000000000000 30.0000000000000000

Li C N O Co  
 3 20 4 2 1

Direct

0.6114407655728087 0.6831466654956094 0.4352009299799545  
 0.6805878655456390 0.4061701578155559 0.4372707059111916

|                    |                    |                    |
|--------------------|--------------------|--------------------|
| 0.9637827446847910 | 0.6322674482424026 | 0.4246213414849735 |
| 0.8085095041189329 | 0.6333799903791392 | 0.3569040737779722 |
| 0.8913339551958596 | 0.4868645293273915 | 0.3577029457155629 |
| 0.0644397948139984 | 0.4869144599499608 | 0.3586517855008432 |
| 0.1469308071104603 | 0.6335776997760674 | 0.3591453776989101 |
| 0.0626424957737963 | 0.7831717272647402 | 0.3597902457686139 |
| 0.8926747712982110 | 0.7827708581013748 | 0.3584842212409788 |
| 0.1468859893499475 | 0.3405290479961119 | 0.3599185397389253 |
| 0.0630636502586576 | 0.1914896336292349 | 0.3603249256988737 |
| 0.8936424807354473 | 0.1912154144650718 | 0.3604795287769911 |
| 0.8096514805718925 | 0.3403397655911839 | 0.3599117223999533 |
| 0.1824429311525766 | 0.9027932536256303 | 0.3614806601859741 |
| 0.1827115356508017 | 0.0720906489888685 | 0.3615622946717306 |
| 0.6242401762474578 | 0.8189766006663254 | 0.3602750813390456 |
| 0.4776376365981084 | 0.9007442697748577 | 0.3623708384504349 |
| 0.3313230997935877 | 0.8184120883703582 | 0.3614643589221403 |
| 0.3318492743230294 | 0.1562612804933626 | 0.3622041380690027 |
| 0.6246927683229512 | 0.1553575909729706 | 0.3628328286402136 |
| 0.4779050097463545 | 0.0738183675776872 | 0.3632361759173001 |
| 0.7733312604241248 | 0.9023670738470182 | 0.3606593012923435 |
| 0.7738395821458524 | 0.0718794987042681 | 0.3618068448968524 |
| 0.3110143893720037 | 0.6541118166724892 | 0.3595415994887612 |
| 0.6449077492452542 | 0.3203085809082470 | 0.3618477817573897 |
| 0.3112914094721599 | 0.3209164433720073 | 0.3605179142829315 |
| 0.6438799015229965 | 0.6539362407926685 | 0.3572701993358932 |
| 0.4856434242567699 | 0.5026841029023142 | 0.4248292936341633 |
| 0.7886131613554269 | 0.5824023986216649 | 0.4529143442813509 |
| 0.4759020424544274 | 0.4883377529123265 | 0.3658663149545738 |

(9) Co-porphyrin/\*Li<sub>4</sub>O<sub>2</sub>

Li<sub>4</sub>O<sub>2</sub>

1.0000000000000000

|                    |                    |                     |
|--------------------|--------------------|---------------------|
| 8.3418199999999985 | 0.0000000000000000 | 0.0000000000000000  |
| 0.0000000000000000 | 8.3399999999999999 | 0.0000000000000000  |
| 0.0000000000000000 | 0.0000000000000000 | 30.0000000000000000 |

Li C N O Co

4 20 4 2 1

Direct

|                    |                    |                    |
|--------------------|--------------------|--------------------|
| 0.6202807002749583 | 0.6884307111681465 | 0.4272690353759063 |
| 0.7089254383748642 | 0.4345129537036381 | 0.4245344407550605 |
| 0.9527335936144378 | 0.6408928767567756 | 0.4265420853582361 |
| 0.6043897416131138 | 0.5301153136376906 | 0.4844019916515530 |
| 0.8087758267168585 | 0.6321429531758286 | 0.3565854312314782 |
| 0.8912356815057568 | 0.4853648562814235 | 0.3581032716431918 |
| 0.0640680622821872 | 0.4853174728131870 | 0.3604253763515020 |
| 0.1463708921416951 | 0.6320214060627853 | 0.3614848095310043 |
| 0.0623605766437854 | 0.7815031522455648 | 0.3607549533002671 |
| 0.8927023816217112 | 0.7812994742394048 | 0.3580401910151779 |
| 0.1463439019365496 | 0.3388148102531917 | 0.3609594540494608 |

|                    |                    |                    |
|--------------------|--------------------|--------------------|
| 0.0625564820358811 | 0.1896803458536425 | 0.3599520718037041 |
| 0.8933793876315602 | 0.1893495537073559 | 0.3589298881749037 |
| 0.8094432379193297 | 0.3381926846651335 | 0.3583021719282679 |
| 0.1822455687504953 | 0.9011662242598862 | 0.3619892741833964 |
| 0.1823001032321864 | 0.0703012452111322 | 0.3614834161833261 |
| 0.6240001287974383 | 0.8180411086157183 | 0.3583108636010324 |
| 0.4773698239160389 | 0.8993312943750132 | 0.3617353803331246 |
| 0.3309818829505984 | 0.8165401202795466 | 0.3626048536689243 |
| 0.3312712120324910 | 0.1545818639567618 | 0.3626713799255149 |
| 0.6242094064715570 | 0.1535348849586146 | 0.3609942932893249 |
| 0.4774939345921188 | 0.0720870469066077 | 0.3624848482082693 |
| 0.7729735663486138 | 0.9010382585957354 | 0.3587302195898860 |
| 0.7731606302341412 | 0.0703063802515887 | 0.3596360889019935 |
| 0.3101798573520085 | 0.6524175924638341 | 0.3625777780740234 |
| 0.6443216221747704 | 0.3181908367125613 | 0.3605068321694272 |
| 0.3102658616046060 | 0.3188543852669253 | 0.3624663570721862 |
| 0.6439292245084414 | 0.6524795594616495 | 0.3567955276123964 |
| 0.4944571396762308 | 0.5002736555965853 | 0.4324706899787817 |
| 0.7839324046817754 | 0.5974852967320446 | 0.4589593690738072 |
| 0.4749606573680606 | 0.4856621246410837 | 0.3684244074134366 |
